# Supplementary material
Source: PubMed Central journal article supplement (PMC4529847)
Supplement: 11302_2015_9460_MOESM1_ESM.pdf [file 11302_2015_9460_MOESM1_ESM.pdf]

**Selectivity is species-dependent: characterization of standard agonists and antagonists at human, rat and mouse adenosine receptors**

Mohamad Wessam Alnouri, Stephan Jepards, Alessandro Casari, Anke Schiedel, Sonja Hinz and Christa E. Müller

*PharmaCenter Bonn, Pharmaceutical Institute, Pharmaceutical Chemistry I, University of Bonn, An der Immenburg 4, D-53121 Bonn, Germany*

corresponding author:

Christa Müller, [christa.mueller@uni-bonn.de](mailto:christa.mueller@uni-bonn.de), phone +49 228 732301; fax +49 228 732567

[alessandro.casari@studenti.unipd.it](mailto:alessandro.casari@studenti.unipd.it), [stephan.jepards@uni-bonn.de](mailto:stephan.jepards@uni-bonn.de), [wessam.alnouri@uni-bonn.de](mailto:wessam.alnouri@uni-bonn.de), [schiedel@uni-bonn.de](mailto:schiedel@uni-bonn.de), [shinz@uni-bonn.de](mailto:shinz@uni-bonn.de)

**Table 1** The gene and protein accession numbers of the adenosine receptors in human, rat and mouse.

|                        | <b>Gene accession number</b> | <b>Protein accession number</b> |
|------------------------|------------------------------|---------------------------------|
| <b>mA<sub>1</sub></b>  | NM_001008533                 | NP_001008533.1                  |
| <b>rA<sub>1</sub></b>  | NM_017155.2                  | NP_058851.2                     |
| <b>hA<sub>1</sub></b>  | NM_000674                    | NP_000665.1                     |
| <b>mA<sub>2A</sub></b> | NM_009630                    | NP_033760.2                     |
| <b>rA<sub>2A</sub></b> | NM_053294.3                  | NP_445746.3                     |
| <b>hA<sub>2A</sub></b> | NM_001278497                 | NP_001265426.1                  |
| <b>mA<sub>2B</sub></b> | NM_007413                    | NP_031439.2                     |
| <b>rA<sub>2B</sub></b> | NM_017161.1                  | NP_058857.1                     |
| <b>hA<sub>2B</sub></b> | NM_000676.2                  | NP_000667.1                     |
| <b>mA<sub>3</sub></b>  | NM_009631.3                  | NP_033761.2                     |
| <b>rA<sub>3</sub></b>  | NM_012896                    | NP_037028.2                     |
| <b>hA<sub>3</sub></b>  | NM_000677.3                  | NP_000668.1                     |

**Table 2** Primer sequences and restriction enzymes used for amplifying the cDNAs of murine adenosine receptors

| Primer                    | Sequence 5'-3'                        | Gene bank reference |
|---------------------------|---------------------------------------|---------------------|
| f-mA <sub>1</sub> -EcoRI  | GAGACGGAATTCATGCCGCCGTACATCTCGGC      | NM_001008533        |
| r-mA <sub>1</sub> -BamHI  | CCTACTAGGATCCCTAGTCATCAGCTTTCTCCTCTG  |                     |
| f-mA <sub>2A</sub> -MfeI  | GAGACGCAATTGGATGGGCTCCTCGGTGTACATC    | NM_009630           |
| r-mA <sub>2A</sub> -XhoI  | CTTACTACTCGAGTCAGGAAGGGGCAAACCTCTGAG  |                     |
| f-mA <sub>2B</sub> -EcoRI | GAGACGGAATTCATGCAGCTAGAGACGCAAGACG    | NM_007413           |
| r-mA <sub>2B</sub> -BamHI | CTTACTAGGATCCTCATAAGCCCAGACTGAGAGTAG  |                     |
| f-mA <sub>3</sub> -NotI   | GTGACAGCGGCCGCATGGAAGCCGACAACACCAAC   | NM_009631.3         |
| r-mA <sub>3</sub> -EcoRI  | CTTACTAGAATTCTTACTCAGTAGTCTGTTCCATG   |                     |
| f-rA <sub>1</sub> -NotI   | GTGACAGCGGCCGCATGCCGCCCTACATCTCGGC    | NM_017155.2         |
| r-rA <sub>1</sub> -EcoRI  | CTTACTAGAATTCCTAGTCCTCAGCTTTCTCCTC    |                     |
| f-rA <sub>2A</sub> -NotI  | GTGACAGCGGCCGCATGGGCTCCTCGGTGTACATC   | NM_053294.3         |
| r-rA <sub>2A</sub> -AgeI  | CTTACTAACCGGTTTCAGGAAGGGGCAAACCTCTGAG |                     |
| f-rA <sub>2B</sub> -EcoRI | GAGACGGAATTCATGCAGCTAGAGACGCAGGAC     | NM_017161.1         |
| r-rA <sub>2B</sub> -BamHI | CTTACTAGGATCCTCACAAGCTCAGACTGAAAGTTG  |                     |

|                          |                                          |           |
|--------------------------|------------------------------------------|-----------|
| f-rA <sub>3</sub> -EcoRI | GAGACGGAATTCATGAAAGCCAACAATACCACG<br>AC  | NM_012896 |
| r-rA <sub>3</sub> -XhoI  | CTTGCAGTCTCGAGCTACTCAGTAGTCTGTTCAA<br>GG |           |

**Table 3** Primer sequences used for amplifying the cDNAs of rat adenosine receptors A<sub>2B</sub> and A<sub>3</sub> from genomic DNA

| Primer                         | Sequence 5'-3'                               |
|--------------------------------|----------------------------------------------|
| f-rA <sub>2B</sub>             | ATGCAGCTAGAGACGCAGGA                         |
| r-rA <sub>2B</sub> -Exon1      | CTGAGCGGGACGCGAATG                           |
| f-rA <sub>2B</sub> -Exon2      | GTATAAAGGTTTGGTCACTGGAA                      |
| r-A <sub>2B</sub>              | TCACAAGCTCAGACTGAAAGTTG                      |
| f-rA <sub>3</sub>              | ATGAAAGCCAACAATACCACGAC                      |
| r-rA <sub>3</sub> -Exon1       | ACTGTCAGCTTGACTCGCAGGTAT                     |
| f-rA <sub>3</sub> -Exon2       | CAGATATAGAACGGTTACCACTCAAAG                  |
| r-rA <sub>3</sub>              | CTACTCAGTAGTCTGTTCAAGGTTT                    |
| r-rA <sub>3</sub> -Overlap-Ex1 | TGGTAACCGTTCTATATCTGACTGTCAGCTTGACTCG<br>CAG |
| f-rA <sub>3</sub> -Overlap-Ex2 | CTGCGAGTCAAGCTGACAGTCAGATATAGAACGGTT<br>ACC  |

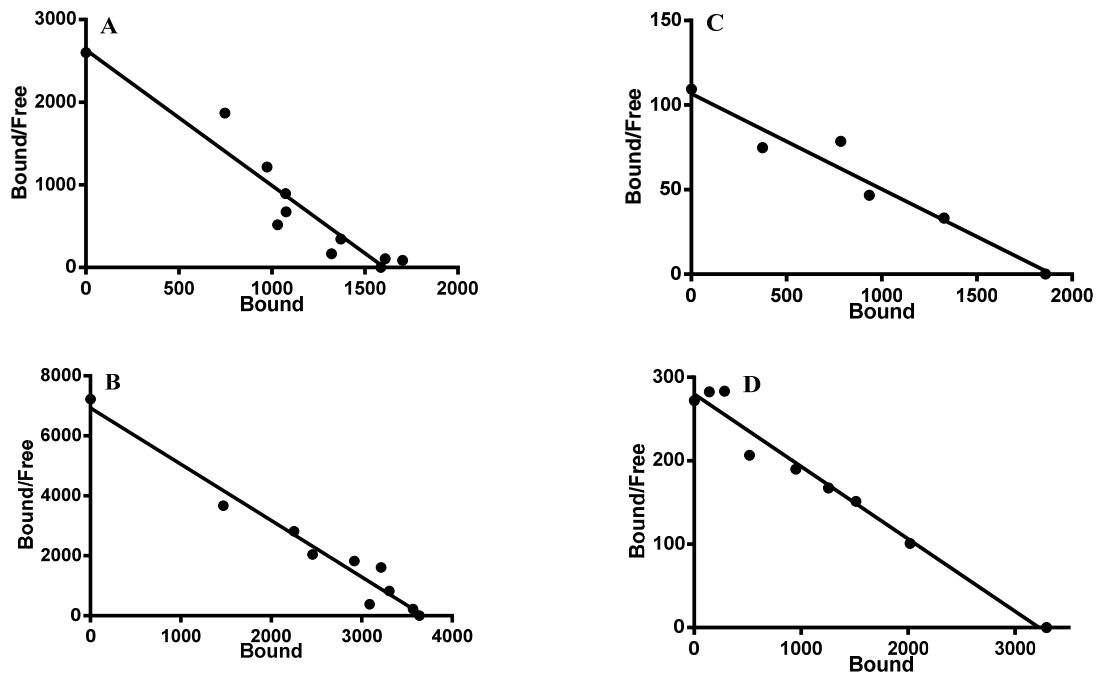

**Fig. S1** Scatchard transformation of saturation binding assays at ARs stably expressed in recombinant CHO cells; **(A)** mA<sub>1</sub>AR using [<sup>3</sup>H]CCPA; **(B)** mA<sub>1</sub>AR using [<sup>3</sup>H]DPCPX; **(C)** mA<sub>2A</sub>AR using [<sup>3</sup>H]CGS-21680; **(D)** mA<sub>2A</sub>AR using [<sup>3</sup>H]MSX-2. Data are means of three independent saturation assays each performed in duplicates.

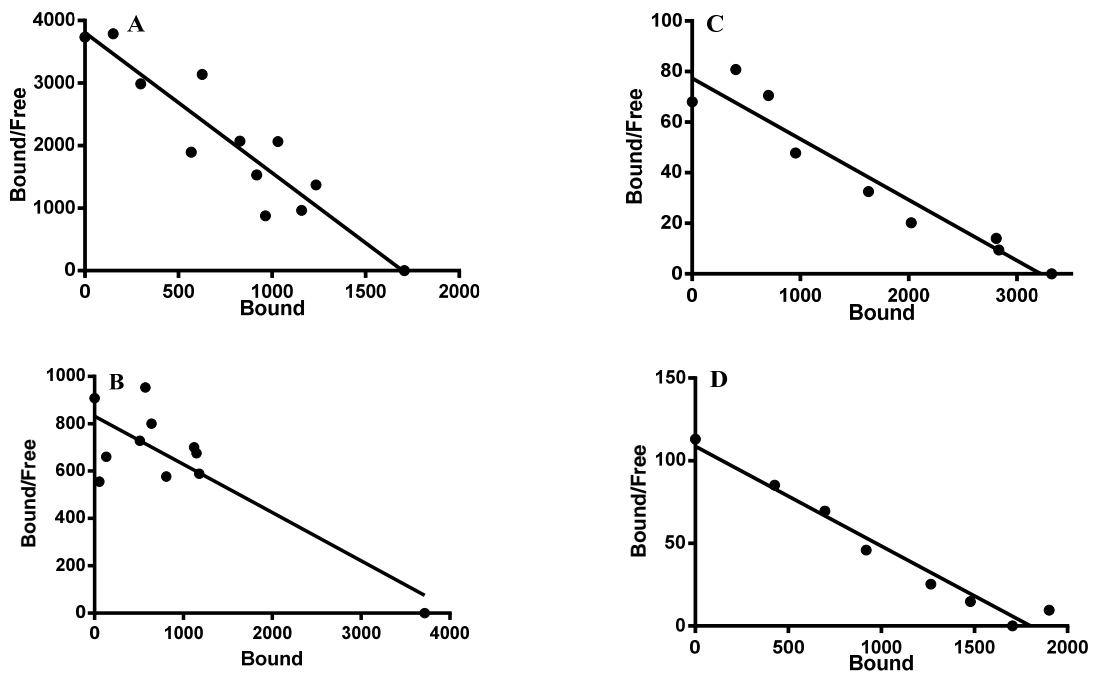

**Fig S2** Scatchard transformation of saturation binding assays at ARs stably expressed in recombinant CHO cells; **(A)** rA<sub>2B</sub>AR using [<sup>3</sup>H]PSB-603; **(B)** mA<sub>2B</sub>AR using [<sup>3</sup>H]PSB-603; **(C)** rA<sub>3</sub>AR using [<sup>3</sup>H]NECA; **(D)** mA<sub>3</sub>AR using [<sup>3</sup>H]NECA. Data are means of three independent saturation assays each performed in duplicates.



```

rA2A      YTLGLGGGSAQGSPR----DVELPTQERQ-EGQEHPGLRGHLVQARVGASSWSSEFAP 409
hA2A      YALGLVSGGSAQESQNTGLPDVELLSHELKGVCPPEPGLDDPLAQDGAVS----- 412
          *: ** .***:* *      **** ::* : * *** .*. * .*:
          .

mA2A      S 410
rA2A      S 410
hA2A      -

```

**Fig. S4** The alignment of the A<sub>2A</sub> adenosine receptor in mouse, rat and human. The transmembrane domains (TMs) are underlined in red. The different amino acids are in blue.

```

mA2B      MQLETQDALYVALELVIAALAVAGNVLVCAAVGASSALQTPTNYFLVSLATADVAVGLFA 60
rA2B      MQLETQDALYVALELVIAALAVAGNVLVCAAVGASSALQTPTNYFLVSLATADVAVGLFA 60
hA2B      MLEETQDALYVALELVIAALSVAGNVLVCAAVGTANTLQTPTNYFLVSLAAADVAVGLFA 60
          * *****:*****: : :*****:*****

mA2B      IPFAITISLGFCTDFHGCLFLACFVLVLTQSSIFSLAVAVDRYLAIKRVPLRYKGLVTGT 120
rA2B      IPFAITISLGFCTDFHSCFLFLACFVLVLTQSSIFSLAVAVDRYLAIKRVPLRYKGLVTGT 120
hA2B      IPFAITISLGFCTDFYGCFLFLACFVLVLTQSSIFSLAVAVDRYLAIKRVPLRYKGLVTGT 120
          *****: .*****:***** ***** .*****

mA2B      RARGIIAVLWVLAFFGIGLTPFLGWNSKDSATSNCTELGDGIANKSCCPVTCLFENVVPM 180
rA2B      RARGIIAVLWVLAFFGIGLTPFLGWNSKDRATSNCTEPGDGITNKSCCPVKCLFENVVPM 180
hA2B      RARGVIAVLWVLAFFGIGLTPFLGWNSKDSATNNCTEPWDGTTNESCLLVKCLFENVVPM 180
          *****:***** ***** * .***** * * :*:*** * .*****

mA2B      YMVYFNFFGCVLPPLLIMLVIIYIKIFMVACKQLQRMELMDHSRTTLQREIHAAKSLAMIV 240
rA2B      YMVYFNFFGCVLPPLLIMMVIYIKIFMVACKQLQHMELEHSRTTLQREIHAAKSLAMIV 240
hA2B      YMVYFNFFGCVLPPLLIMLVIIYIKIFLVACRQLQRTTELMDHSRTTLQREIHAAKSLAMIV 240
          *****:*****:***:***: * *:*****:*****

mA2B      GIFALCWLPVHAINCITLPHALAKDKPKWVMNVAILLSHANSVSNP I VYAYRNRDFRYS 300
rA2B      GIFALCWLPVHAINCITLPHALAKDKPKWVMNVAILLSHANSVSNP I VYAYRNRDFRYS 300
hA2B      GIFALCWLPVHAVNCVTLFQPAQGNKPKWAMNMAILLSHANSVSNP I VYAYRNRDFRYT 300
          *****:***:***:*** .*:***.***:*****:*****:*****:*****

mA2B      FHKIIISRYVLCQAETKGGSGQAGAQSTLSLGL 332
rA2B      FHRIIISRYVLCQTDTKGGSGQAGGQSTFSLSL 332
hA2B      FHKIIISRYLLCQADVKSNGQAGVQPALGVGL 332
          **:*****:***:*. * .***** * .: : .: *

```

**Fig. S5** The alignment of the A<sub>2B</sub> adenosine receptor in mouse, rat and human. The transmembrane domains (TMs) are underlined in red. The different amino acids are in blue.

```

mA3      MEADN-TTETDNLNITYITMEAAIGLCAVVGNNMLVIWVVKLNPTLRITTTFFYFIVSLALAD 59
rA3      MKANNITTSALWLQITYITMEAAIGLCAVVGNNMLVIWVVKLNRTLRITTTFFYFIVSLALAD 60
hA3      -MPNN-STALSLANVTYITMEIFIGLCAIVGNVLVICVVKLNPSLQITTTFFYFIVSLALAD 58
          .:* : *      :***** *****:***:*** ***** :*:*****:*****

mA3      IAVGVLVTPLAIAVSLQVKMHFYACLFMSCVLLIFTHASIMSLLAIAVDYRLRVKLTVRV 119
rA3      IAVGVLVIPLAIAVSLQVMHFYACLFMSCVLLVFTTHASIMSLLAIAVDYRLRVKLTVRV 120
hA3      IAVGVLVMPLAIVVSLGITIHFYSCLFMTCLLLIFTHASIMSLLAIAVDYRLRVKLTVRV 118
          ***** ***** .*** : :***:***:***:***:*****:*****:*****

mA3      RTVTTQRRIWFLGLCWLVSFLVGLTPMFGWNRKATLASSQNSSTLLCHFRSVVSLDYMV 179
rA3      RTVTTQRRIWFLGLCWLVSFLVGLTPMFGWNRKVTLELSQNSSTLLSCHFRSVVGLDYMV 180
hA3      KRVTTHRRIWLAIGLWLVSLVGLTPMFGWNNKLTSEYHRNVTFLSCQFVSVMRMDYMV 178
          : * *:***** *****:***** * *      : * : * * : * : * : * : *

```

```

mA3      FFSFVTWILVPLVVMCVIYLDIFYIIRNKLSQNLSGFRETRAFYGREFKTAKSLFVLVFL 239
rA3      FFSFITWILIPLVVMCIYLDIFYIIRNKLSQNLTGFRETRAFYGREFKTAKSLFVLVFL 240
hA3      YFSFLTWFIFIPLVVMCAIYLDIFYIIRNKLSLNLSNSKETGAFYGREFKTAKSLFVLVFL 238
          :***:***:***** ***** **:_:** *****
          :***:***:***** ***** **:_:** *****

mA3      FALCWLPLSIINFVSYFDVKIPDVAMCLGILLSHANSMMNPIVYACKIKKFKETYFLILR 299
rA3      FALCWLPLSIINFVSYFNVKIPEIAMCLGILLSHANSMMNPIVYACKIKKFKETYFVILR 300
hA3      FALSWLPLSIINCIIFYFNGEVQVLVLYMGILLSHANSMMNPIVYAYKIKKFKETYLLILK 298
          ***.***** : **: :*:.: :***** *****:***:
          ***.***** : **: :*:.: :***** *****:***:

mA3      ALRLCQTSDSLDSNMEQTTE 319
rA3      ACRLCQTSDSLDSNLEQTTE 320
hA3      ACVVCHPSDSLDTSEKNSE 318
          *  :*: .*****.:*:*:*

```

**Fig. S6** The alignment of the A<sub>3</sub> adenosine receptor in mouse, rat and human. The transmembrane domains (TMs) are underlined in red. The different amino acids are in blue.



## Correlation of pK<sub>i</sub> values

In order to determine the correlation coefficients, the available pK<sub>i</sub> values of all the compounds (both from this work as well as from literature) were calculated and a linear regression of the pK<sub>i</sub> values was conducted. The R<sup>2</sup> of the linear regression analysis is equal to the correlation coefficient. A compound was not taken into consideration if it was only screened (for example, if K<sub>i</sub> value > 10 μM).

Correlation coefficients of the pK<sub>i</sub> values at A<sub>1</sub> were found to be between 0.74 and 0.80, whereas the correlation coefficients of pK<sub>i</sub> values at A<sub>2A</sub> ranged between 0.83 and 0.88. Interestingly, the correlation between the three species is better at the A<sub>2A</sub>AR than A<sub>1</sub>AR despite their lower sequence identity. It was also counterintuitive that results for mouse and rat A<sub>2A</sub>AR correlate slightly worse than mouse with human receptor. The curves and correlation coefficients are given in figure S7.

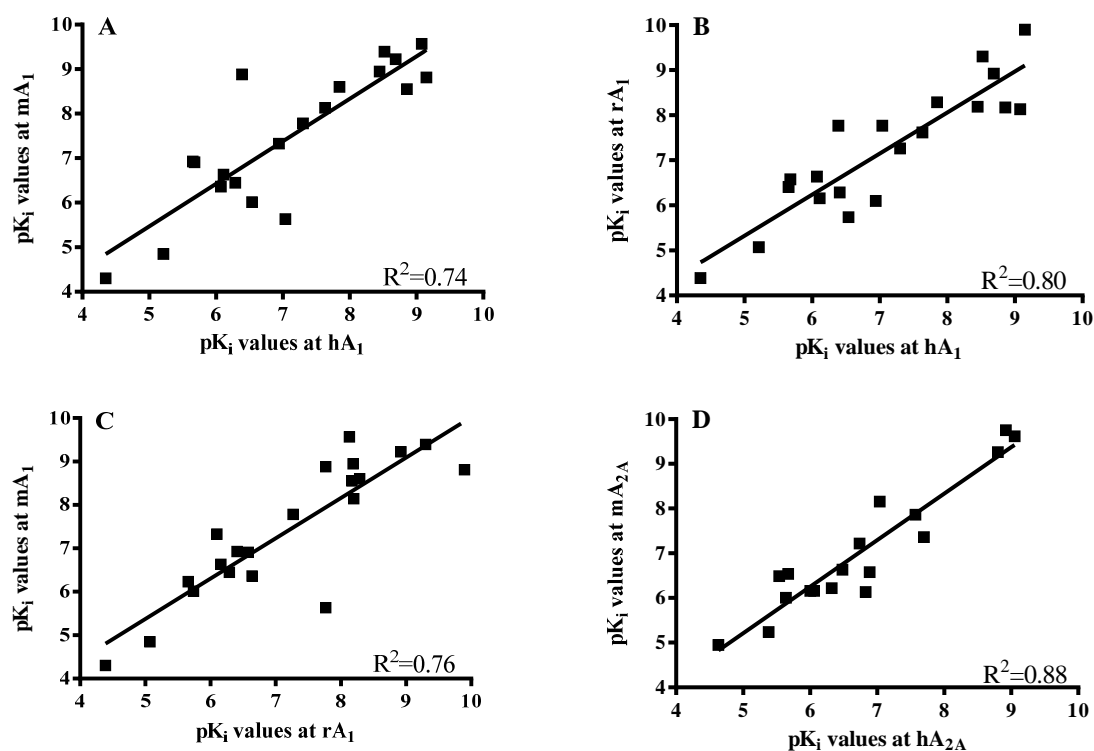

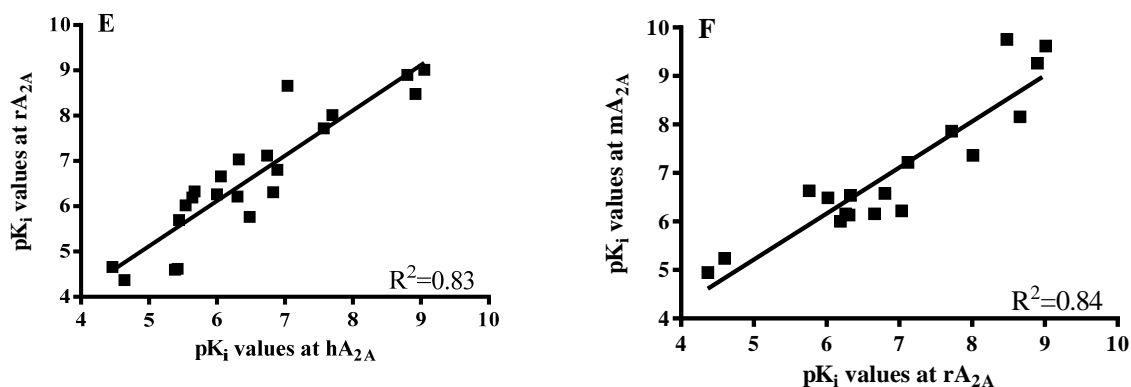

**Fig. S7 1** Correlation of the  $pK_i$  values at  $A_1$  and  $A_{2A}$  receptors in the human, rat and mouse.

**A:** correlation between mouse and human at  $A_1$ AR, **B:** correlation between rat and human at  $A_1$ AR, **C:** correlation between rat and mouse at  $A_1$ AR, **D:** correlation between mouse and human at  $A_{2A}$ AR, **E:** correlation between rat and human at  $A_{2A}$ AR, **F:** correlation between rat and mouse at  $A_{2A}$ AR.

The correlation coefficients of the  $pK_i$  values at  $A_{2B}$  were also high, ranging between 0.82 and 0.90. The correlation between the species at  $A_3$ AR is not expected to be high since the genetic divergence is high. Many antagonists were not considered because they were not active at  $A_3$ AR. The correlation coefficient between mouse and human was only 0.52 but if we considered only  $A_3$  agonists the coefficient will increase to 0.93 (data not shown). Rat correlates better with human than mouse with coefficient of 0.83, whereas rat and mouse correlate less with a correlation coefficient of 0.73 as shown in figure S8.

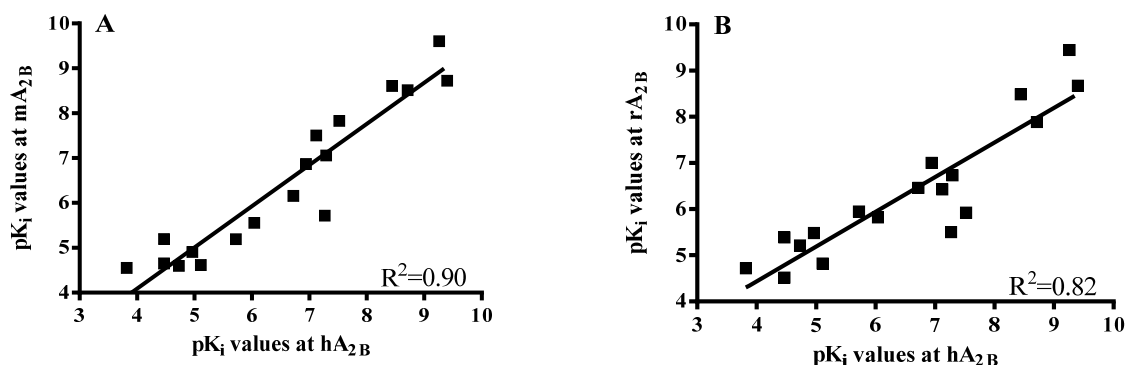

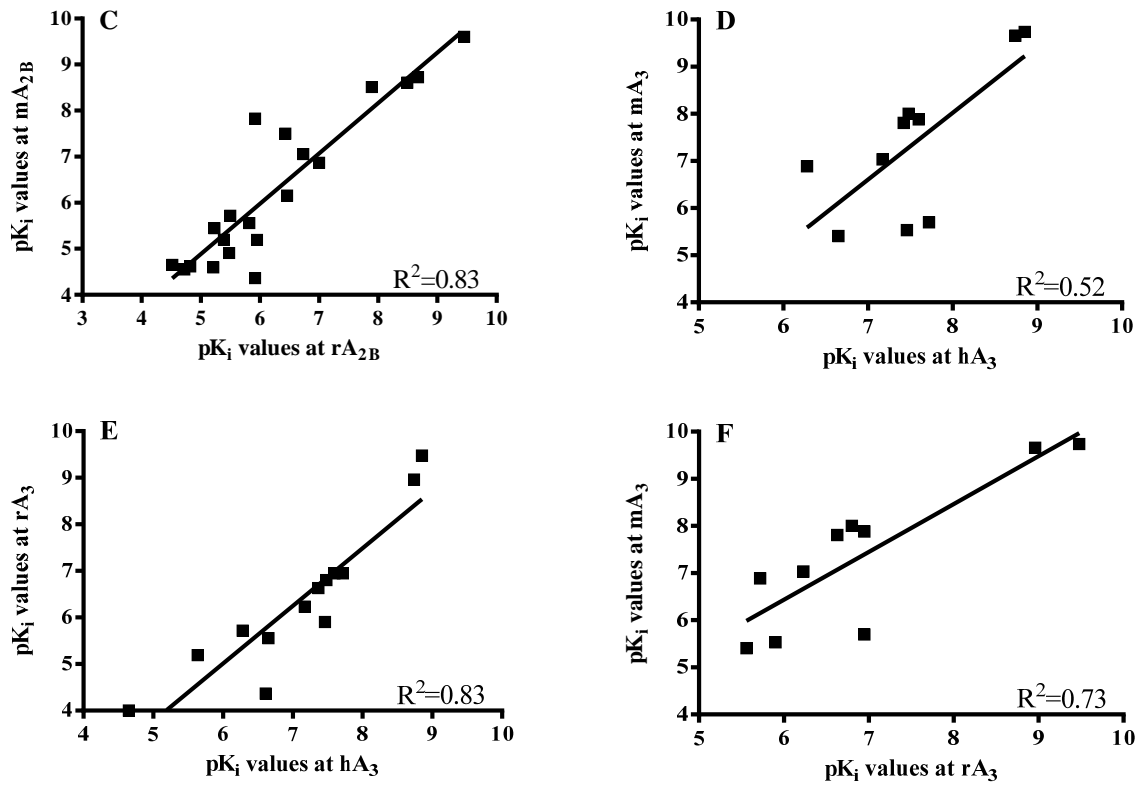

**Fig. S8** Correlation of the pK<sub>i</sub> values at A<sub>1</sub> and A<sub>2A</sub> receptors in the human, rat and mouse.

**A:** correlation between mouse and human at A<sub>2B</sub>AR, **B:** correlation between rat and human at A<sub>2B</sub>AR, **C:** correlation between rat and mouse at A<sub>2B</sub>AR, **D:** correlation between mouse and human at A<sub>3</sub>AR, **E:** correlation between rat and human at A<sub>3</sub>AR, **F:** correlation between rat and mouse at A<sub>3</sub>AR.
